# Supplementary material for: An unusual Me3SiI-promoted [4+2] annulation and reduction: an efficient approach to construct 4H-benzopyrans
Source: Royal Society of Chemistry journal article supplement (doi:10.1039/c1cc16028a), 2011-11-16
Supplement: c1cc16028a.pdf [file c1cc16028a.pdf]

## Supporting Information

### An Unusual Me<sub>3</sub>SiI-Promoted [4+2] Annulation and Reduction: An Efficient Approach to Construct 4*H*-Benzopyrans

Feijun Wang,<sup>\*a</sup> Mingliang Qu,<sup>a</sup> Feng Chen,<sup>\*a</sup> Li Li,<sup>a</sup> and Min Shi<sup>\*a,b</sup>

<sup>1</sup>Key Laboratory for Advanced Materials and Institute of Fine Chemicals, School of Chemistry & Molecular Engineering, East China University of Science and Technology, and 130 MeiLong Road, Shanghai 200237, People's Republic of China, and <sup>2</sup>State Key Laboratory of Organometallic Chemistry, Shanghai Institute of Organic Chemistry, Chinese Academy of Sciences, 354 Fenglin Road, Shanghai 200032, People's Republic of China

[feijunwang@ecust.edu.cn](mailto:feijunwang@ecust.edu.cn), [Mshi@mail.sioc.ac.cn](mailto:Mshi@mail.sioc.ac.cn)

#### CONTENTS

|                                                                                                                       |     |
|-----------------------------------------------------------------------------------------------------------------------|-----|
| General remarks.....                                                                                                  | S2  |
| General procedure for the Me <sub>3</sub> SiI-promoted reaction of salicylic aldehyde with β-dicarbonyl compound..... | S3  |
| Reference.....                                                                                                        | S18 |

**General remarks.** Dichloromethane was freshly distilled from calcium hydride; THF and toluene were distilled from sodium (Na) under argon (Ar) atmosphere. Melting points were determined on a digital melting point apparatus and temperatures were uncorrected.  $^1\text{H}$  NMR and  $^{13}\text{C}$  NMR spectra were recorded on a Bruker AM-300 or AM-400 spectrophotometers. Infrared spectra were recorded on a Perkin-Elmer PE-983 spectrometer with absorption in  $\text{cm}^{-1}$ . Flash column chromatography was performed using 300-400 mesh silica gel. For thin-layer chromatography (TLC), silica gel plates (Huanghai GF<sub>254</sub>) were used. Mass spectra were recorded by EI and ESI, and HRMS were measured on a HP-5989 instrument.

### General procedure for the Me<sub>3</sub>SiI-promoted reaction of salicylic aldehyde with $\beta$ -dicarbonyl compound.

To a stirred mixture of Me<sub>3</sub>SiCl (5.0 mmol), NaI (5.0 mmol),  $\beta$ -dicarbonyl compound **1** (1.0 mmol) and CH<sub>3</sub>CN (5 mL) was added salicylic aldehyde **2** (1.0 mmol) at ice-bath temperature. The reaction mixture was stirred at room temperature for 24 h. After addition of aqueous Na<sub>2</sub>S<sub>2</sub>O<sub>4</sub> to the reaction mixture, the organic layer was extracted with dichloromethane, washed with brine, dried over MgSO<sub>4</sub>, and concentrated under reduced pressure. The residue was purified by chromatography on silica gel to obtain the 4*H*-benzopyran **3**.

#### Ethyl 2-methyl-4*H*-chromene-3-carboxylate **3aa**.<sup>1</sup>

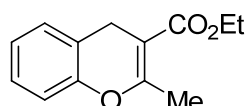

Yellow liquid; <sup>1</sup>H NMR (400 MHz, CDCl<sub>3</sub>, TMS)  $\delta$  1.33 (t, *J* = 7.2 Hz, 3H), 2.38 (s, 3H), 3.60 (s, 2H), 4.23 (dd, *J* = 7.6, 14.4 Hz, 2H), 6.90 (dd, *J* = 1.2, 8.4 Hz, 1H), 7.02 (dt, *J* = 1.2, 7.2 Hz, 1H), 7.09-7.16 (m, 2H); <sup>13</sup>C NMR (100 MHz, CDCl<sub>3</sub>, TMS)  $\delta$  14.4, 19.2, 24.8, 60.1, 100.9, 116.0, 120.5, 124.0, 127.5, 128.7, 150.1, 160.6, 167.6; MS (ESI) *m/z* (%): 219.1 (M + H, 100); HRMS (Micromass LCT) Calcd. for C<sub>13</sub>H<sub>15</sub>O<sub>3</sub>: 219.1021; Found: 219.1023.

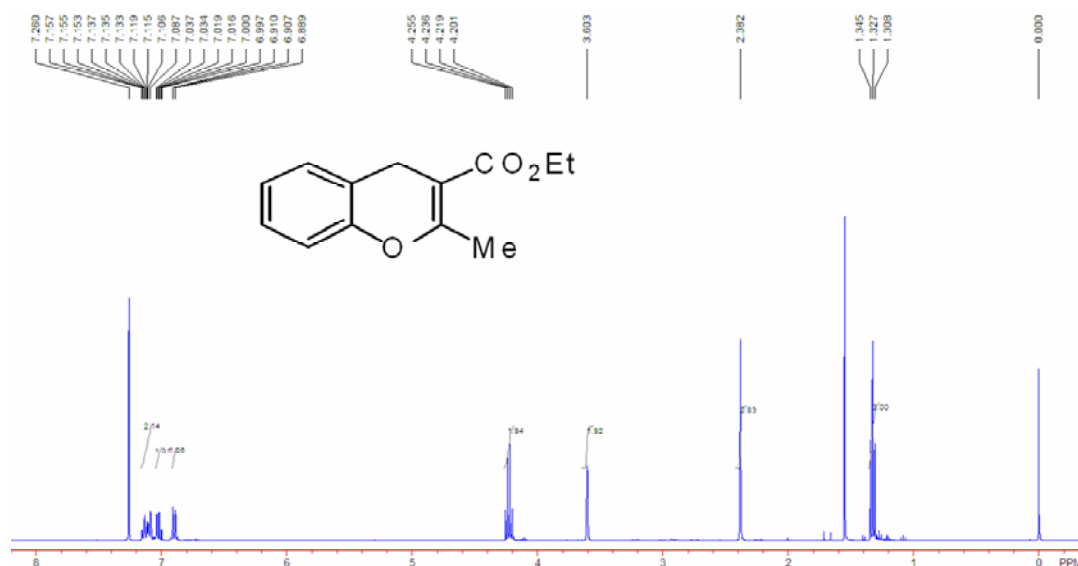

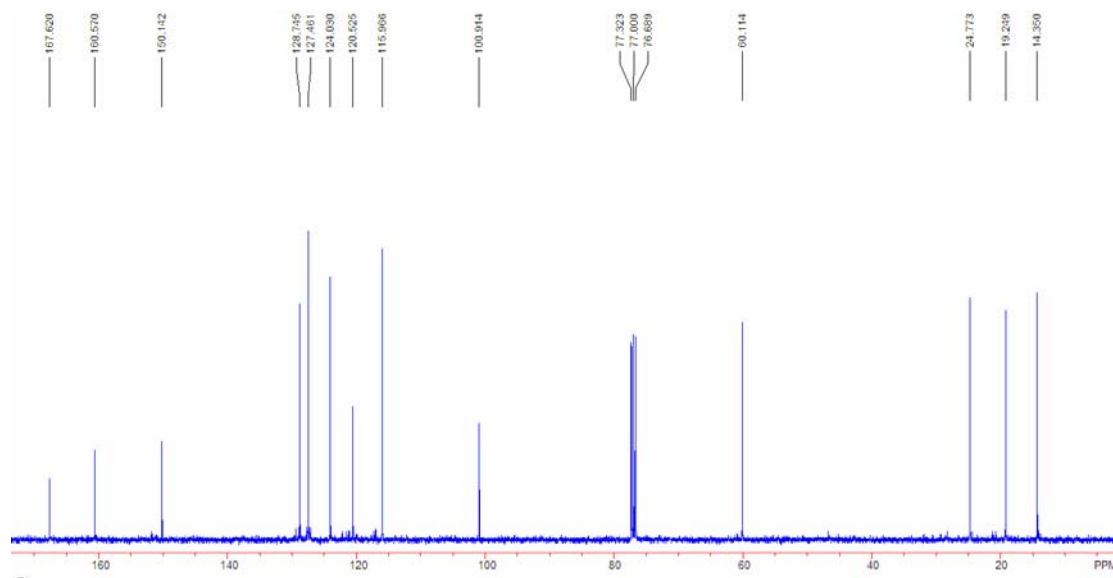

Ethyl 8-methoxy-2-methyl-4*H*-chromene-3-carboxylate **3ab**.

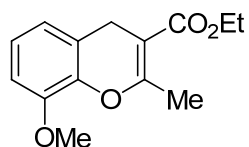

Yellow solid; Mp. 95.3-995.8 °C; <sup>1</sup>H NMR (400 MHz, CDCl<sub>3</sub>, TMS) δ 1.32 (t, *J* = 7.2 Hz, 3H), 2.44 (s, 3H), 3.60 (s, 2H), 3.87 (s, 3H), 4.23 (dd, *J* = 7.2, 14.4 Hz, 2H), 6.69 (d, *J* = 7.6 Hz, 1H), 6.74 (d, *J* = 8.0 Hz, 1H), 6.96 (t, *J* = 8.0 Hz, 1H); <sup>13</sup>C NMR (100 MHz, CDCl<sub>3</sub>, TMS) δ 14.2, 19.0, 24.7, 55.7, 59.9, 100.7, 109.8, 120.1, 121.3, 123.6, 139.5, 147.3, 160.2, 167.3; MS (ESI) *m/z* (%): 249.1 (M + H, 100); HRMS (Micromass LCT) Calcd. for C<sub>14</sub>H<sub>17</sub>O<sub>4</sub>: 249.1127; Found: 249.1135.

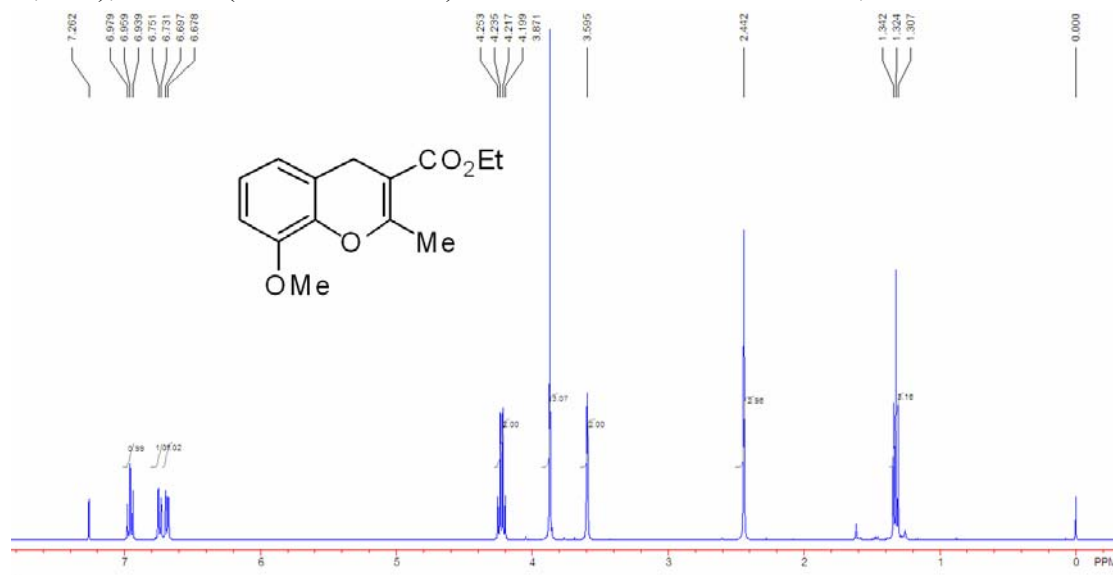

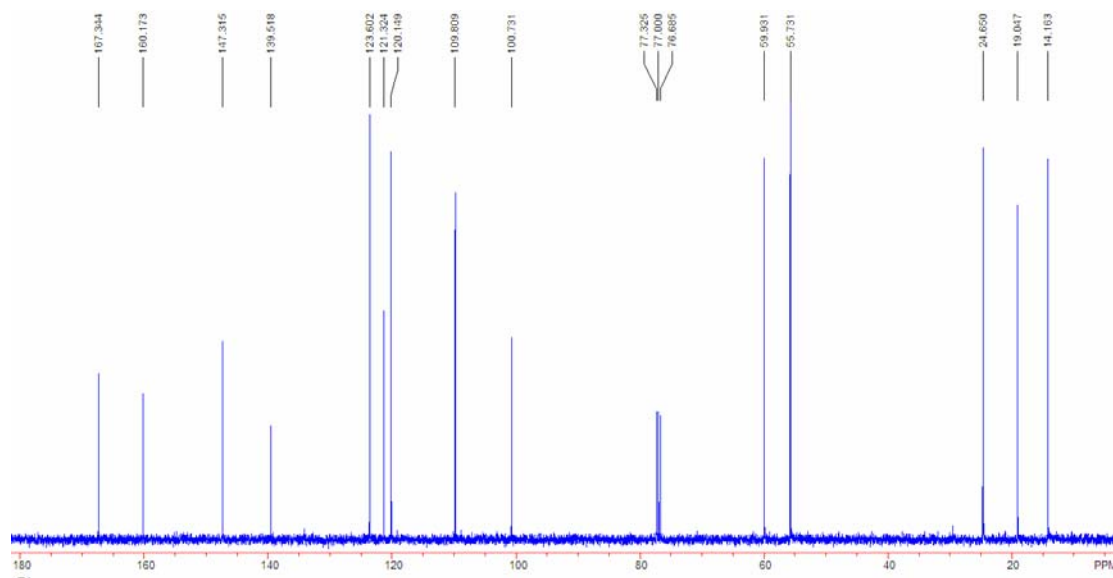

Ethyl 7-(diethylamino)-2-methyl-4*H*-chromene-3-carboxylate **3ac**.

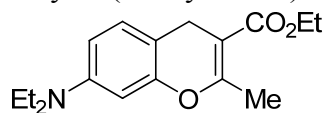

Yellow liquid;  $^1\text{H}$  NMR (400 MHz,  $\text{CDCl}_3$ , TMS)  $\delta$  1.15 (t,  $J = 7.2$  Hz, 6H), 1.32 (t,  $J = 6.8$  Hz, 3H), 2.37 (s, 3H), 3.31 (t,  $J = 7.2$  Hz, 4H), 3.48 (s, 2H), 4.21 (dd,  $J = 7.6, 14.4$  Hz, 2H), 6.22 (t,  $J = 2.0$  Hz, 1H), 6.40 (dd,  $J = 2.4, 8.4$  Hz, 1H), 6.92 (t,  $J = 8.8$  Hz, 3H);  $^{13}\text{C}$  NMR (100 MHz,  $\text{CDCl}_3$ , TMS)  $\delta$  12.3, 14.1, 19.1, 23.7, 44.2, 59.7, 98.8, 101.1, 106.7, 108.2, 128.9, 147.3, 150.7, 160.2, 167.7; MS (ESI)  $m/z$  (%): 290.2 (M + H, 78); HRMS (Micromass LCT) Calcd. for  $\text{C}_{17}\text{H}_{24}\text{NO}_3$ : 290.1756; Found: 290.1752.

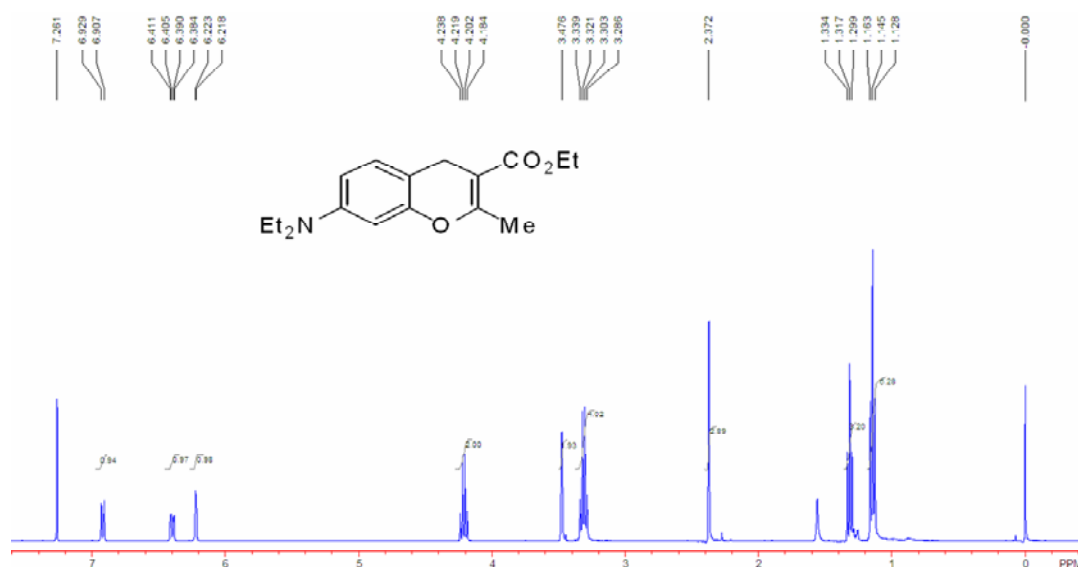

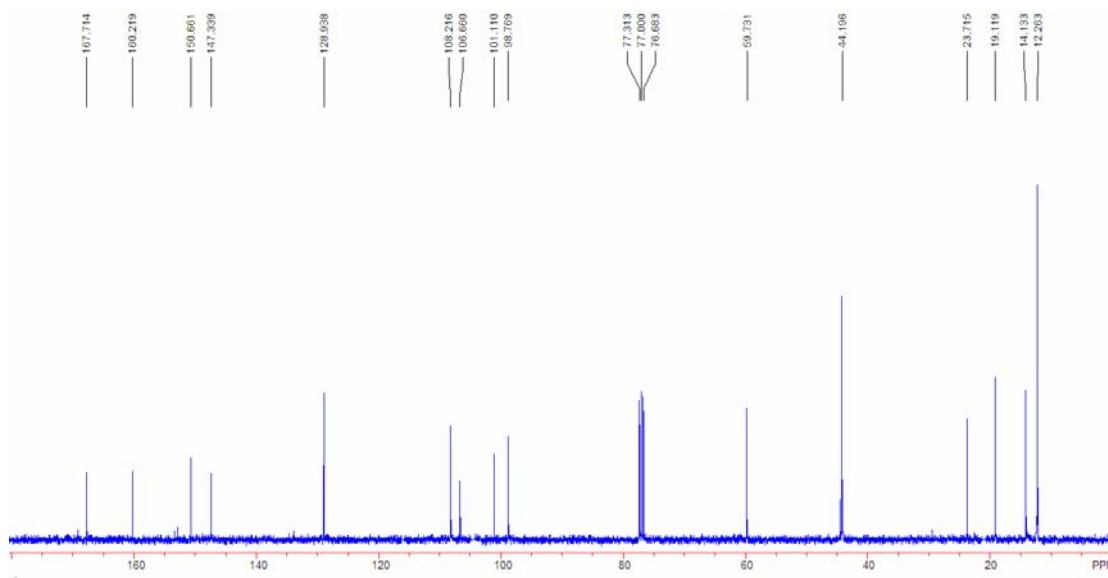

Ethyl 6-methoxy-2-methyl-4*H*-chromene-3-carboxylate **3ad**.

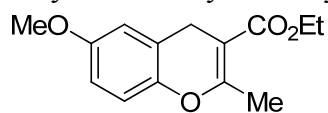

Yellow liquid;  $^1\text{H}$  NMR (400 MHz,  $\text{CDCl}_3$ , TMS)  $\delta$  1.32 (t,  $J = 6.8$  Hz, 3H), 2.37 (s, 3H), 3.58 (s, 2H), 3.76 (s, 3H), 4.22 (dd,  $J = 7.2, 14.4$  Hz, 2H), 6.61 (d,  $J = 2.8$  Hz, 1H), 6.68 (dd,  $J = 2.8, 9.2$  Hz, 1H), 6.84 (d,  $J = 8.4$  Hz, 1H);  $^{13}\text{C}$  NMR (100 MHz,  $\text{CDCl}_3$ , TMS)  $\delta$  14.2, 19.1, 25.0, 55.3, 59.8, 99.7, 112.7, 113.0, 116.6, 121.1, 144.0, 155.8, 160.6, 167.5; MS (ESI)  $m/z$  (%): 249.1 (M + H, 100); HRMS (Micromass LCT) Calcd. for  $\text{C}_{14}\text{H}_{17}\text{O}_4$ : 249.1127; Found: 249.1130.

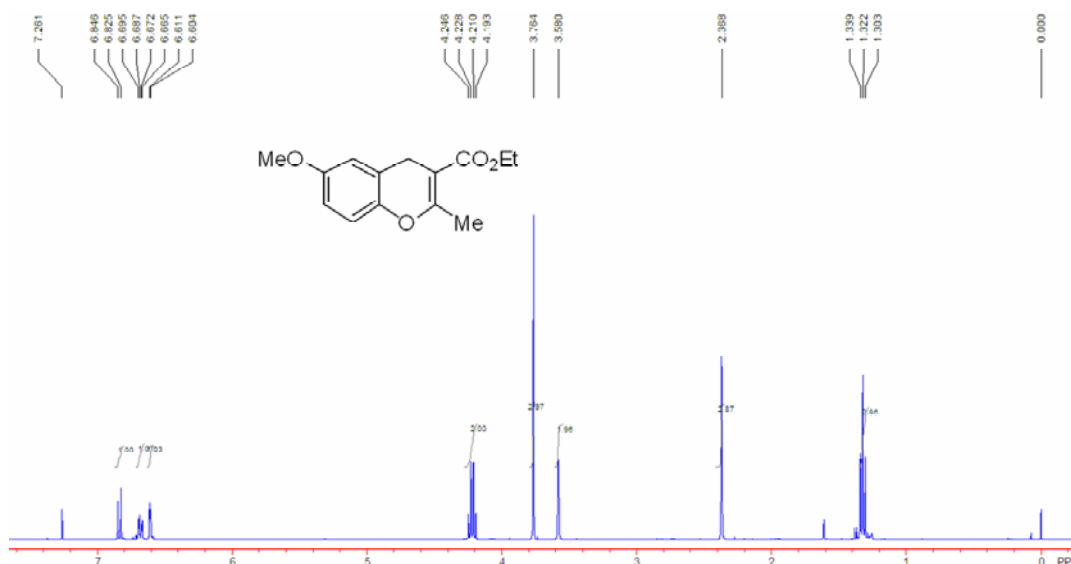

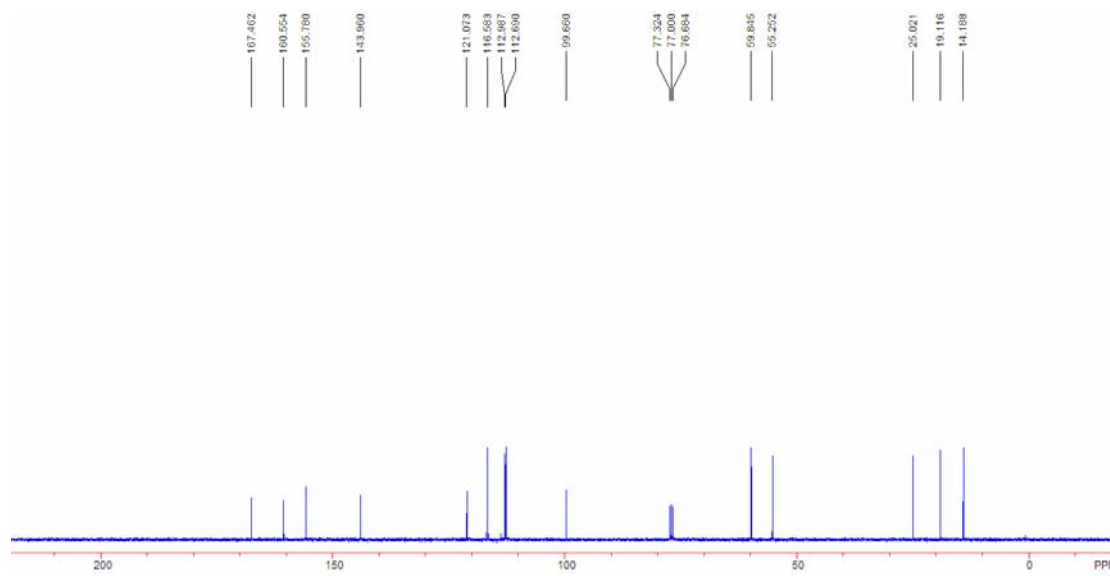

Ethyl 6-chloro-2-methyl-4*H*-chromene-3-carboxylate **3ae**.

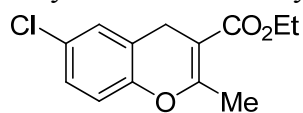

Yellow liquid;  $^1\text{H}$  NMR (400 MHz,  $\text{CDCl}_3$ , TMS)  $\delta$  1.32 (t,  $J$  = 7.6 Hz, 3H), 2.37 (s, 3H), 3.57 (s, 2H), 4.23 (dd,  $J$  = 7.2, 14.0 Hz, 2H), 6.83 (d,  $J$  = 8.4 Hz, 1H), 7.08-7.10 (m, 2H);  $^{13}\text{C}$  NMR (100 MHz,  $\text{CDCl}_3$ , TMS)  $\delta$  14.3, 19.2, 24.7, 60.4, 100.5, 117.3, 122.2, 127.5, 128.4, 128.7, 148.6, 160.5, 167.4; MS (ESI)  $m/z$  (%): 253.1 (M + H, 65); HRMS (Micromass LCT) Calcd. for  $\text{C}_{13}\text{H}_{14}\text{ClO}_3$ : 253.0631; Found: 253.0632.

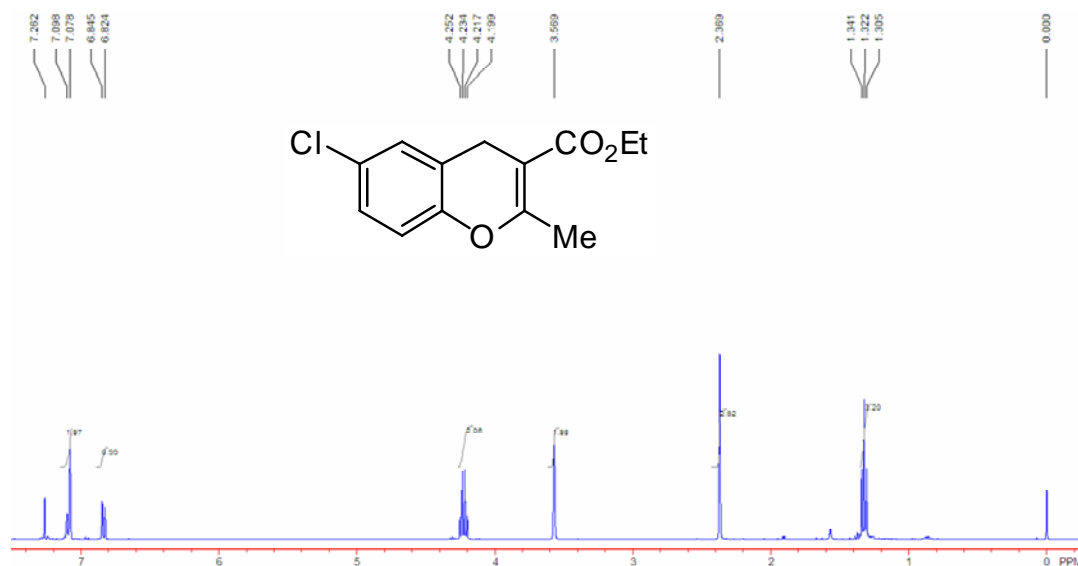

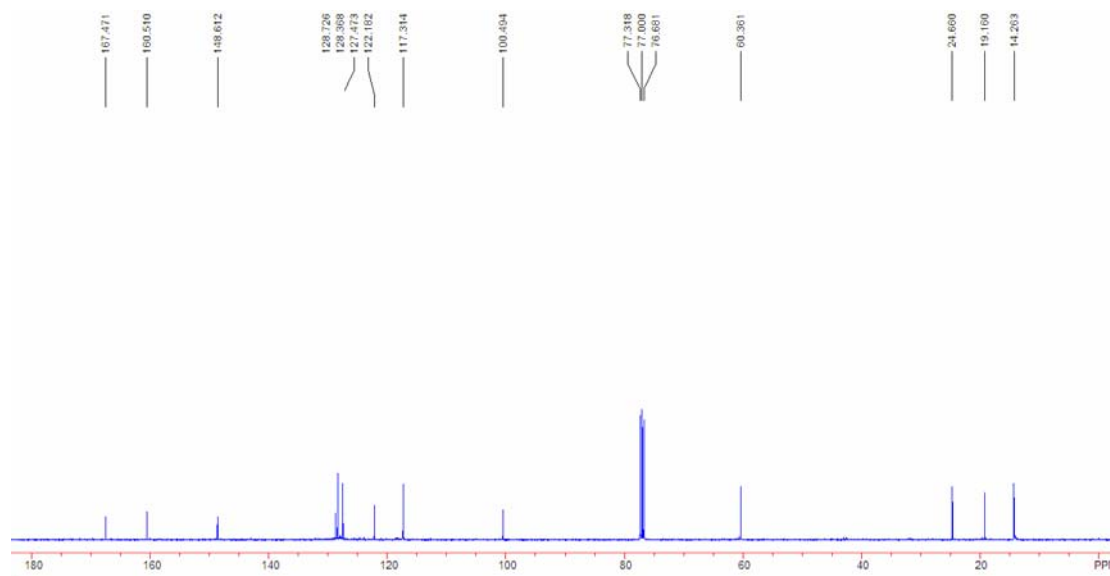

Ethyl 6-bromo-2-methyl-4*H*-chromene-3-carboxylate **3af**.

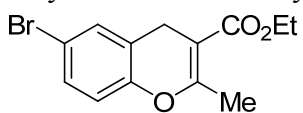 Red liquid;  $^1\text{H}$  NMR (400 MHz,  $\text{CDCl}_3$ , TMS)  $\delta$  1.32 (t,  $J$  = 7.2 Hz, 3H), 2.37 (s, 3H), 3.57 (s, 2H), 4.22 (dd,  $J$  = 6.8, 14.0 Hz, 2H), 6.78 (d,  $J$  = 9.2 Hz, 1H), 7.23-7.24 (m, 2H);  $^{13}\text{C}$  NMR (100 MHz,  $\text{CDCl}_3$ , TMS)  $\delta$  14.3, 19.1, 24.6, 60.3, 100.7, 116.2, 117.7, 122.7, 130.4, 131.4, 149.3, 160.3, 167.3; MS (ESI)  $m/z$  (%): 297.0 (M + H, 89); HRMS (Micromass LCT) Calcd. for  $\text{C}_{13}\text{H}_{14}\text{BrO}_3$ : 297.0126; Found: 297.0133.

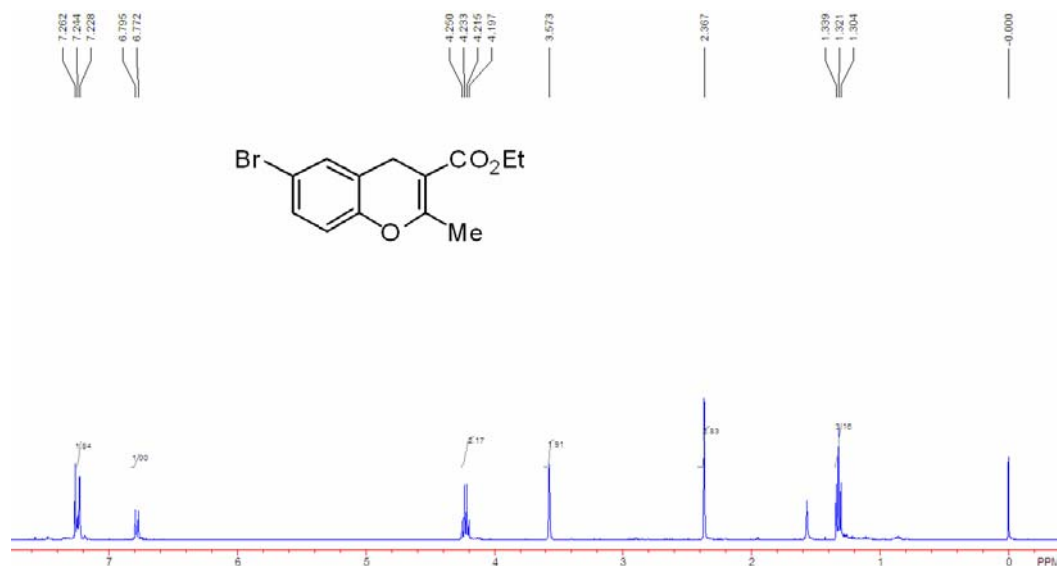



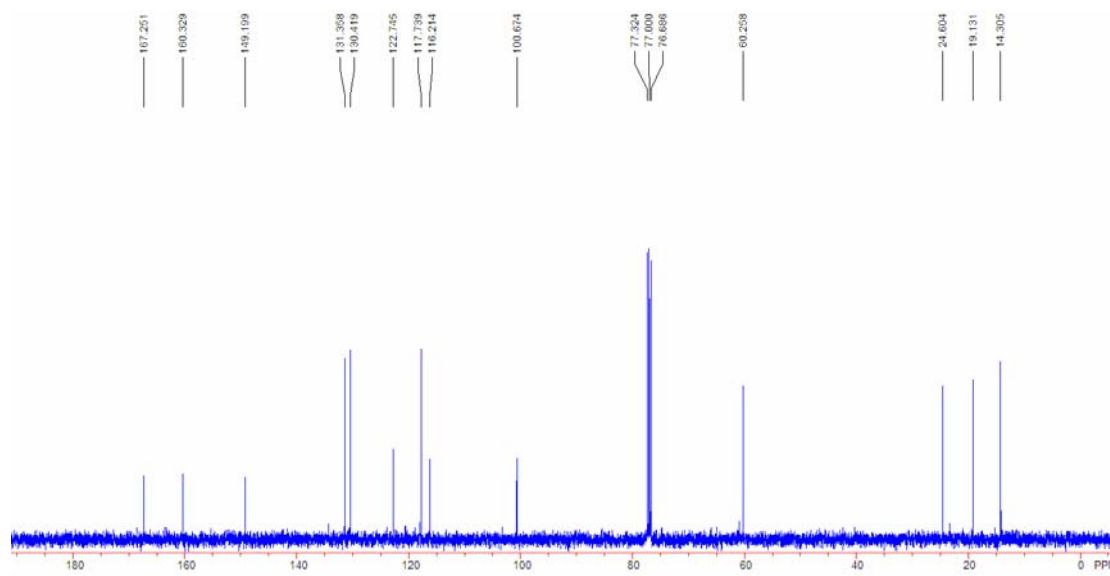

Ethyl 6-iodo-2-methyl-4*H*-chromene-3-carboxylate **3ag**.

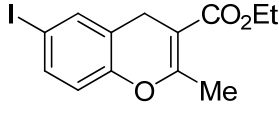 Yellow liquid;  $^1\text{H}$  NMR (400 MHz,  $\text{CDCl}_3$ , TMS)  $\delta$  1.32 (t,  $J$  = 7.2 Hz, 3H), 2.36 (s, 3H), 3.56 (s, 2H), 4.23 (dd,  $J$  = 7.2, 14.4 Hz, 2H), 6.66 (d,  $J$  = 9.2 Hz, 1H), 7.42 (s, 2H);  $^{13}\text{C}$  NMR (100 MHz,  $\text{CDCl}_3$ , TMS)  $\delta$  14.3, 19.2, 24.4, 60.3, 68.7, 100.9, 118.2, 123.3, 136.4, 137.4, 150.1, 160.3, 167.3; MS (ESI)  $m/z$  (%): 345.0 (M + H, 100); HRMS (Micromass LCT) Calcd. for  $\text{C}_{13}\text{H}_{14}\text{IO}_3$ : 344.9988; Found: 344.9995.

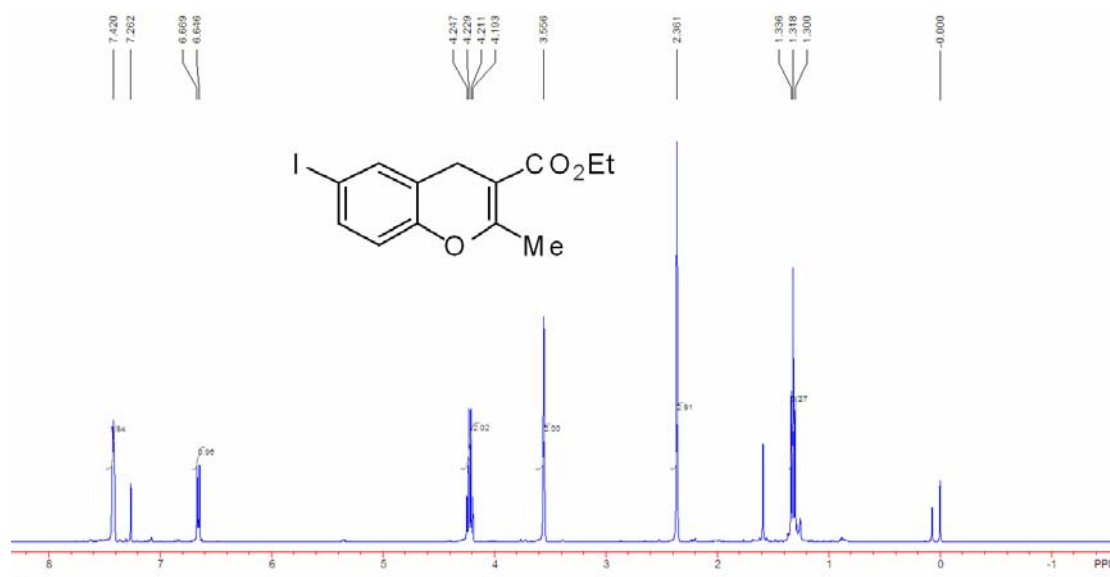

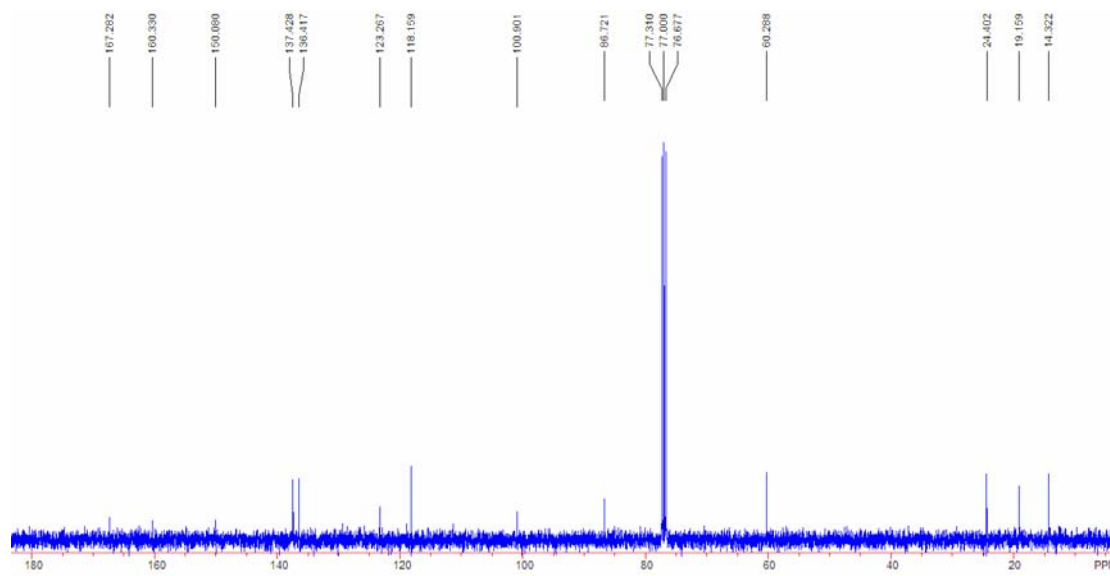

Ethyl 2-methyl-6-nitro-4*H*-chromene-3-carboxylate **3ah**.

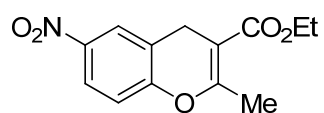

White solid; Mp. 110.5-111.2 °C; <sup>1</sup>H NMR (400 MHz, CDCl<sub>3</sub>, TMS) δ 1.34 (t, *J* = 7.2 Hz, 3H), 2.41 (s, 3H), 3.69 (s, 2H), 4.25 (dd, *J* = 7.2, 14.4 Hz, 2H), 7.01 (d, *J* = 9.6 Hz, 1H), 8.04-8.06 (m, 2H); <sup>13</sup>C NMR (100 MHz, CDCl<sub>3</sub>, TMS) δ 14.3, 18.9, 24.8, 60.6, 101.4, 116.8, 121.8, 123.7, 124.8, 154.8, 159.8, 166.7; MS (ESI) *m/z* (%): 264.1 (M + H, 90); HRMS (Micromass LCT) Calcd. for C<sub>13</sub>H<sub>14</sub>NO<sub>5</sub>: 264.0872; Found: 264.0874.

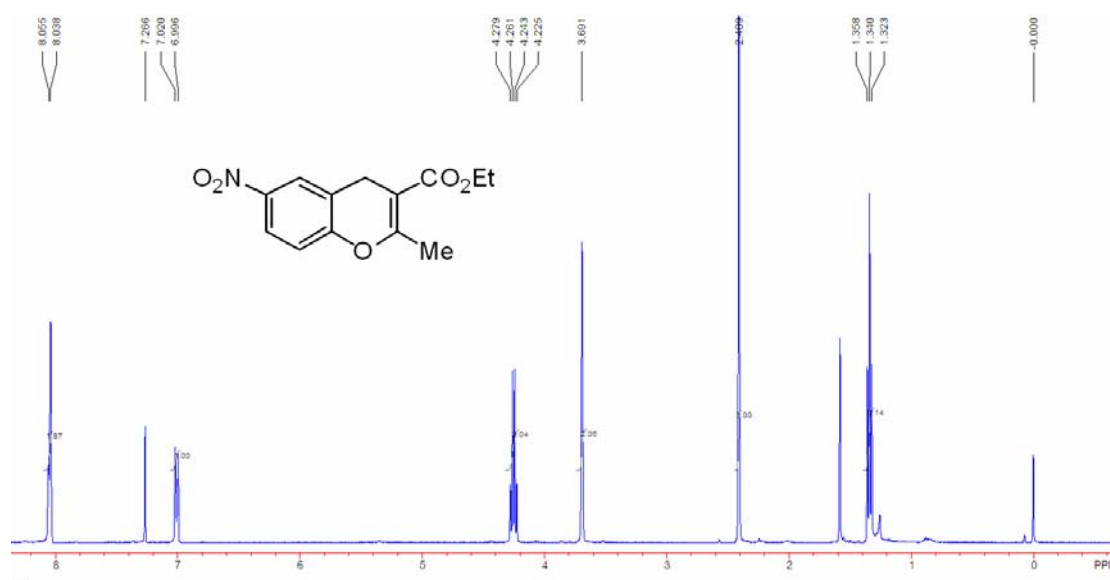

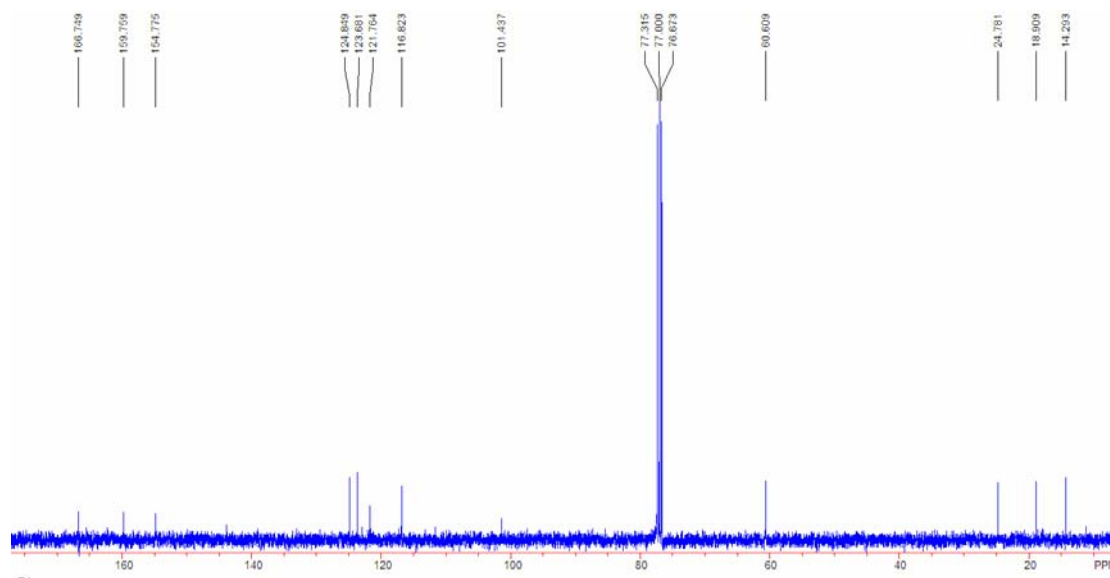

Ethyl 8-hydroxy-2-methyl-6-nitro-4*H*-chromene-3-carboxylate **3ai**.

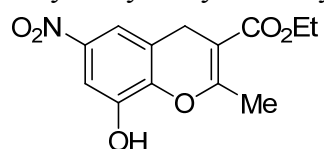

White solid; <sup>1</sup>H NMR (400 MHz, CDCl<sub>3</sub>, TMS) δ 1.35 (t, *J* = 7.6 Hz, 3H), 2.46 (s, 3H), 3.68 (s, 2H), 4.26 (dd, *J* = 7.2, 14.0 Hz, 2H), 5.82 (br s, 1H), 7.62 (s, 1H), 7.67 (s, 1H); <sup>13</sup>C NMR (100 MHz, CDCl<sub>3</sub>, TMS) δ 14.3, 18.8, 24.8, 60.8, 102.4, 109.8, 115.7, 121.5, 142.5, 144.0, 158.8, 166.6; MS (ESI) *m/z* (%): 280.1 (M + H, 56); HRMS (Micromass LCT) Calcd. for C<sub>13</sub>H<sub>14</sub>NO<sub>6</sub>: 280.0821; Found: 280.0823.

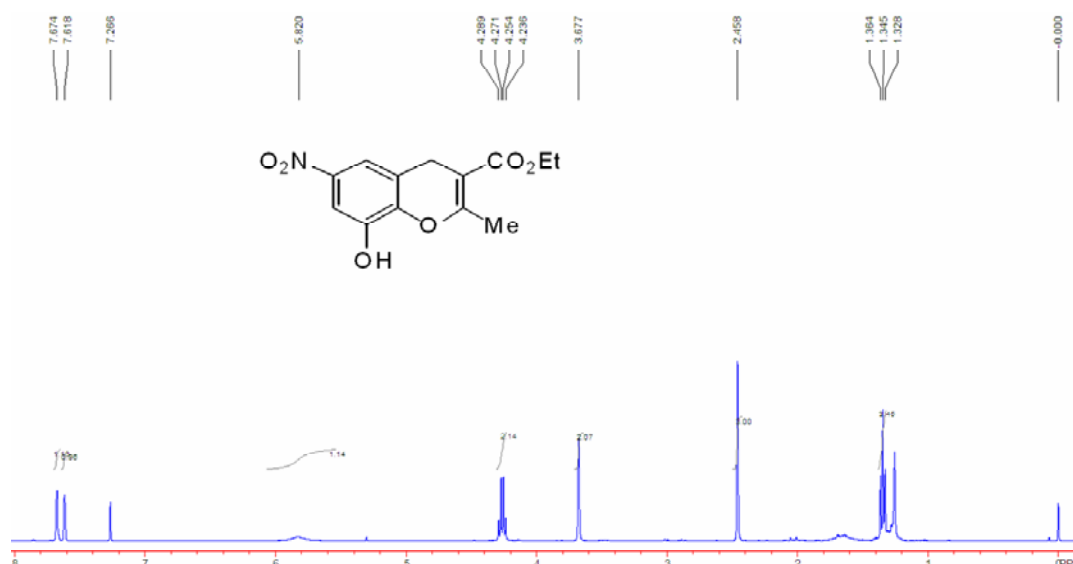

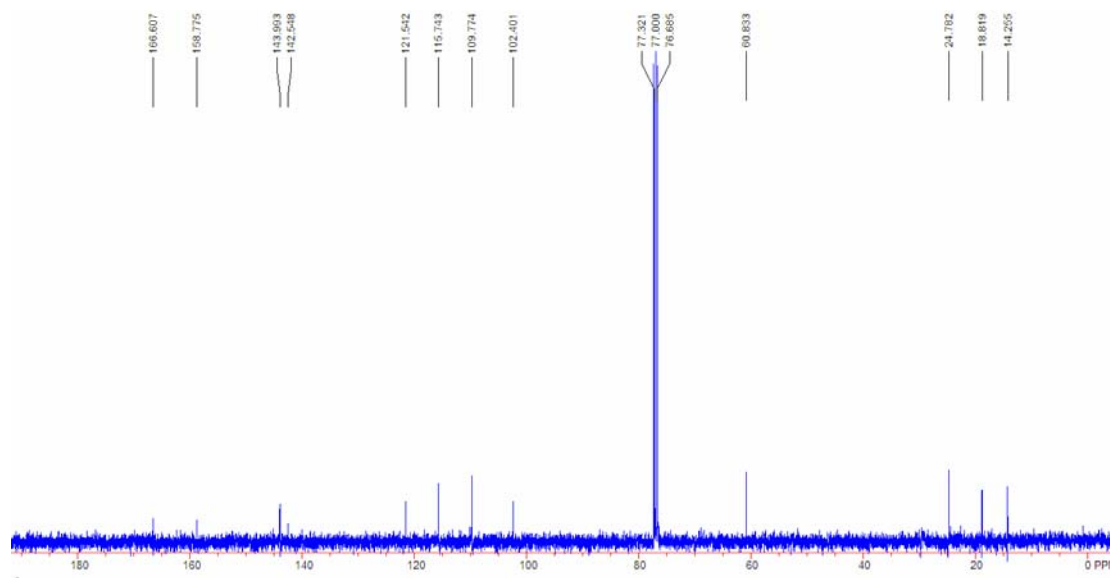

Ethyl 6,8-dichloro-2-methyl-4*H*-chromene-3-carboxylate **3aj**.

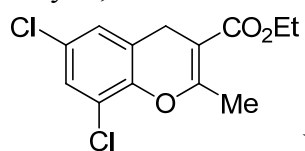

Yellow solid; Mp. 120.5-121.1 °C; <sup>1</sup>H NMR (400 MHz, CDCl<sub>3</sub>, TMS) δ 1.32 (t, *J* = 7.6 Hz, 3H), 2.40 (s, 3H), 3.54 (s, 2H), 4.23 (dd, *J* = 6.8, 14.4 Hz, 2H), 6.93 (s, 1H), 7.15 (s, 1H); <sup>13</sup>C NMR (100 MHz, CDCl<sub>3</sub>, TMS) δ 14.2, 18.9, 25.0, 60.4, 101.1, 122.1, 123.4, 126.7, 127.9, 128.4, 144.8, 160.0, 166.7; MS (ESI) *m/z* (%): 287.0 (M + H, 100); HRMS (Micromass LCT) Calcd. for C<sub>13</sub>H<sub>13</sub>Cl<sub>2</sub>O<sub>3</sub>: 287.0242; Found: 287.0244.

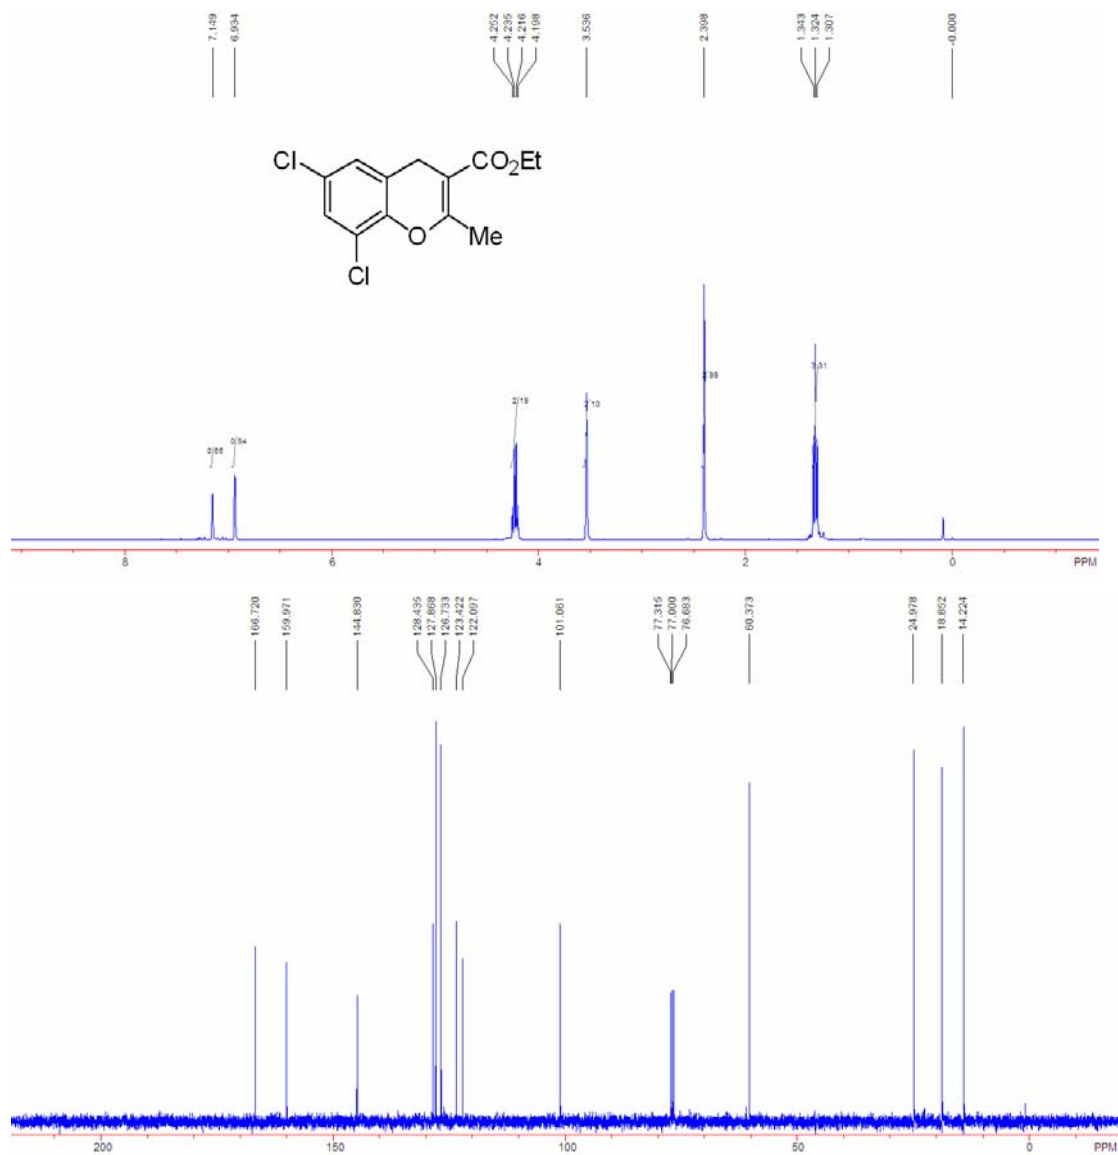

Ethyl 6-bromo-8-methoxy-2-methyl-4H-chromene-3-carboxylate **3ak**.

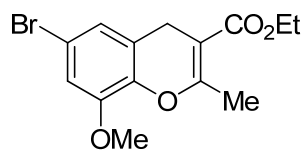

Red solid; Mp. 187.1-187.6 °C;  $^1\text{H}$  NMR (400 MHz,  $\text{CDCl}_3$ , TMS)  $\delta$  1.32 (t,  $J = 7.2$  Hz, 3H), 2.41 (s, 3H), 3.53 (s, 2H), 3.84 (s, 3H), 4.22 (dd,  $J = 7.2, 14.8$  Hz, 2H), 6.81 (d,  $J = 2.0$  Hz, 1H), 6.83 (d,  $J = 2.0$  Hz, 1H);  $^{13}\text{C}$  NMR (100 MHz,  $\text{CDCl}_3$ , TMS)  $\delta$  14.3, 19.1, 24.6, 56.1, 60.2, 100.7, 113.4, 115.8, 122.8, 123.0, 138.8, 148.1, 160.1, 167.2; MS (ESI)  $m/z$  (%): 327.0 (M + H, 90); HRMS (Micromass LCT) Calcd. for  $\text{C}_{14}\text{H}_{16}\text{BrO}_4$ : 327.0232; Found: 327.0239.

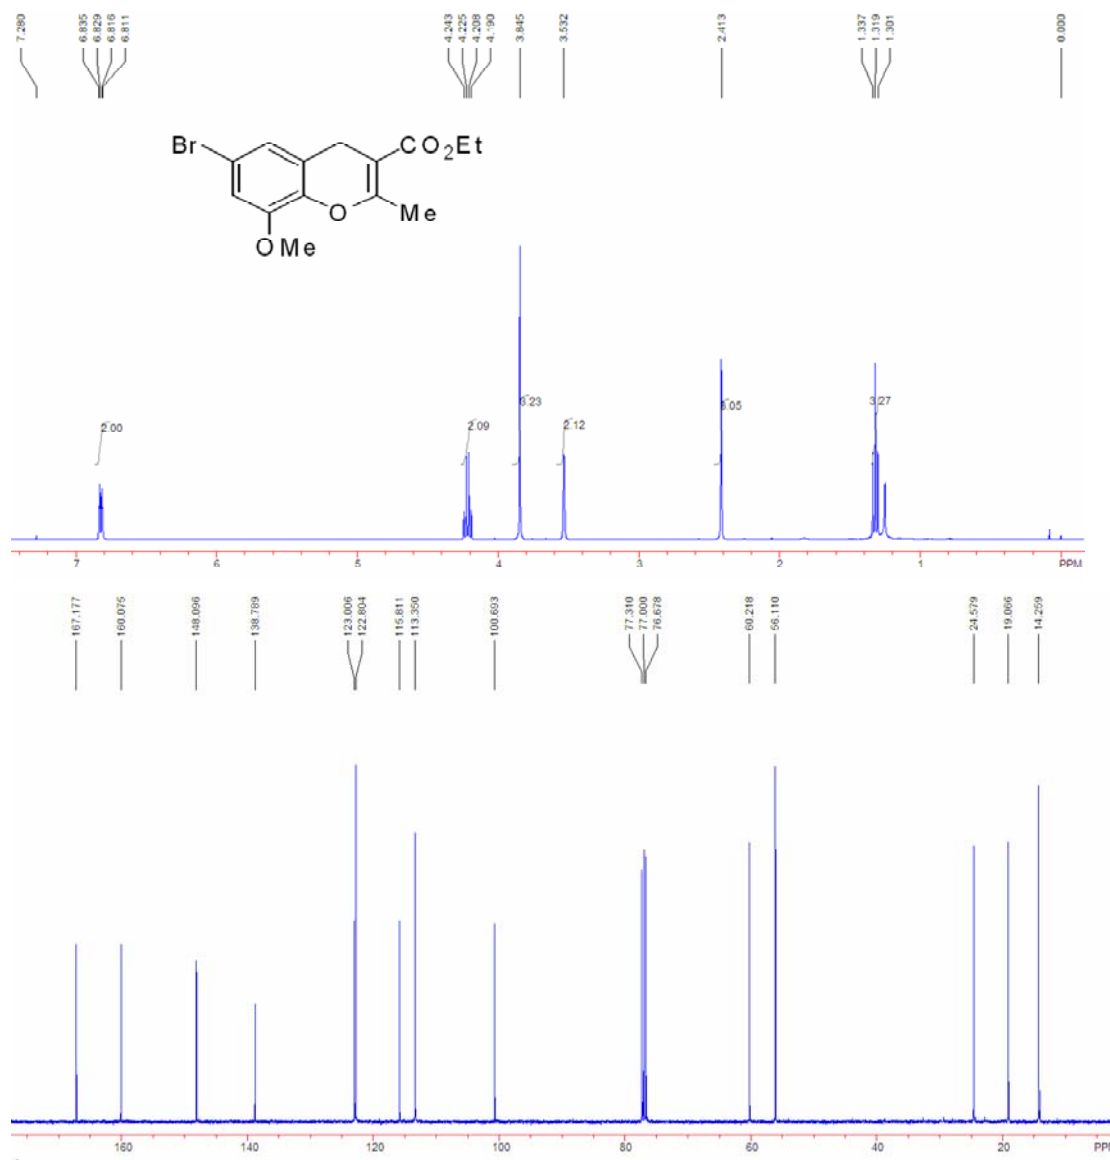

1-(2-Methyl-4H-chromen-3-yl)ethanone **3ba**.<sup>2</sup>

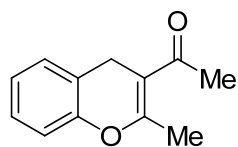

Yellow liquid; <sup>1</sup>H NMR (400 MHz, CDCl<sub>3</sub>, TMS) δ 2.31 (s, 3H), 2.34 (t, *J* = 1.2 Hz, 3H), 3.67 (s, 2H), 6.91 (dd, *J* = 1.2, 8.4 Hz, 1H), 7.03 (dt, *J* = 1.2, 7.6 Hz, 1H), 7.10-7.17 (m, 2H); <sup>13</sup>C NMR (100 MHz, CDCl<sub>3</sub>, TMS) δ 19.8, 25.4, 29.6, 108.9, 115.8, 120.0, 124.0, 127.4, 128.6, 149.7, 159.8, 198.7; MS (ESI) *m/z* (%): 189.1 (M + H, 80); HRMS (Micromass LCT) Calcd. for C<sub>12</sub>H<sub>13</sub>O<sub>2</sub>: 189.0916; Found: 189.0920.

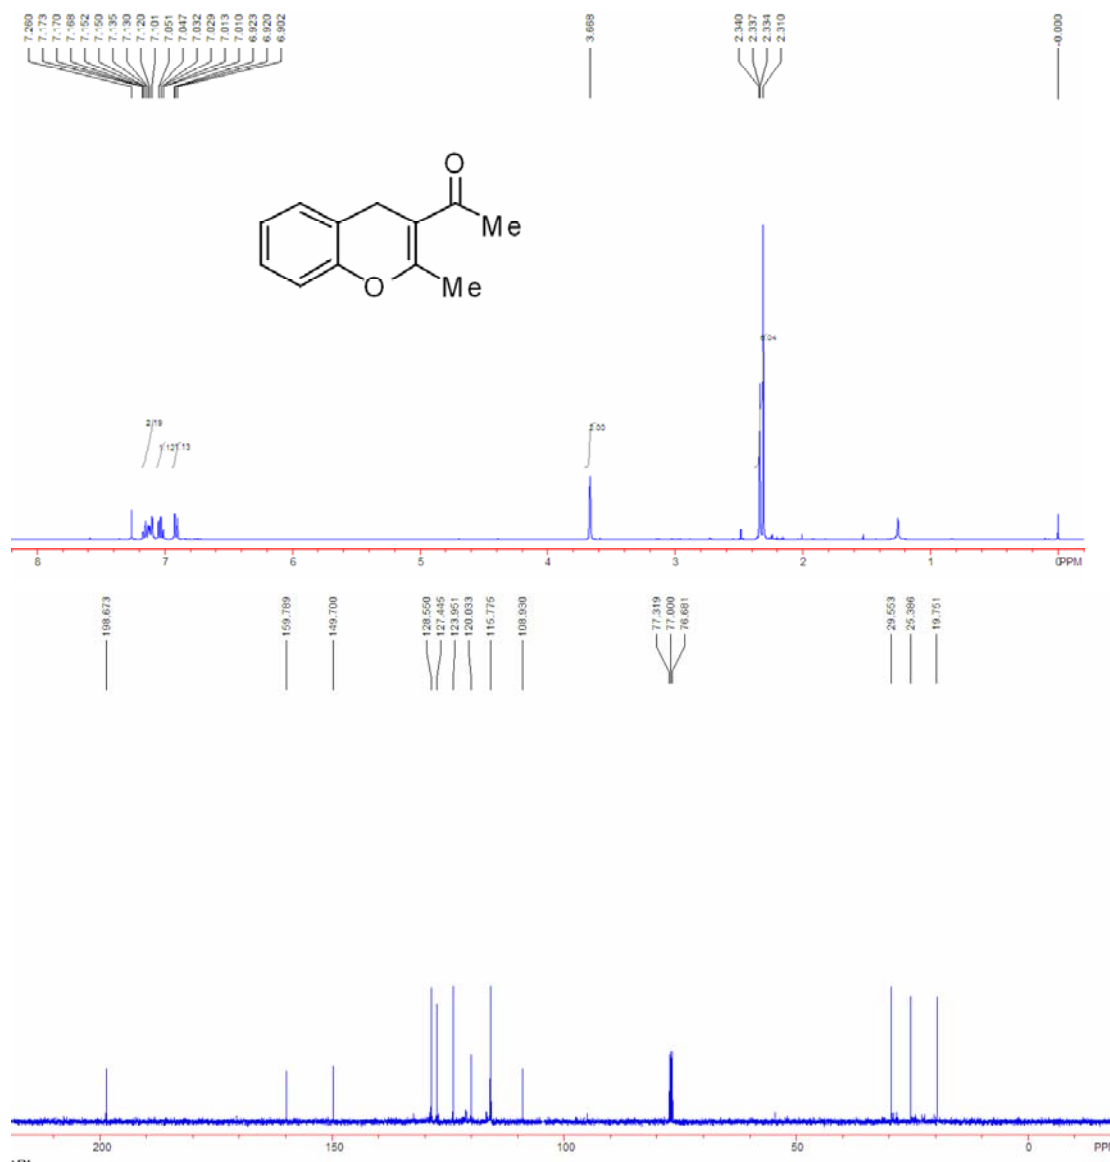

Ethyl 2-(2-ethoxy-2-oxoethyl)-4*H*-chromene-3-carboxylate **3ca**.

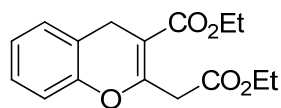

Yellow liquid;  $^1\text{H}$  NMR (400 MHz,  $\text{CDCl}_3$ , TMS)  $\delta$  1.24 (t,  $J = 7.2$  Hz, 3H), 1.28 (t,  $J = 7.2$  Hz, 3H), 3.61 (s, 2H), 3.83 (s, 2H), 4.14-4.21 (m, 4H), 6.86 (dd,  $J = 0.8, 8.0$  Hz, 1H), 6.98 (dt,  $J = 0.8, 7.2$  Hz, 1H), 7.04-7.11 (m, 2H);  $^{13}\text{C}$  NMR (100 MHz,  $\text{CDCl}_3$ , TMS)  $\delta$  13.8, 13.9, 24.4, 38.5, 60.2, 60.7, 103.3, 115.8, 119.7, 124.1, 127.3, 128.5, 149.6, 155.8, 166.6, 168.9; MS (ESI)  $m/z$  (%): 291.1 (M + H, 72); HRMS (Micromass LCT) Calcd. for  $\text{C}_{16}\text{H}_{19}\text{O}_5$ : 291.1232; Found: 291.1235.

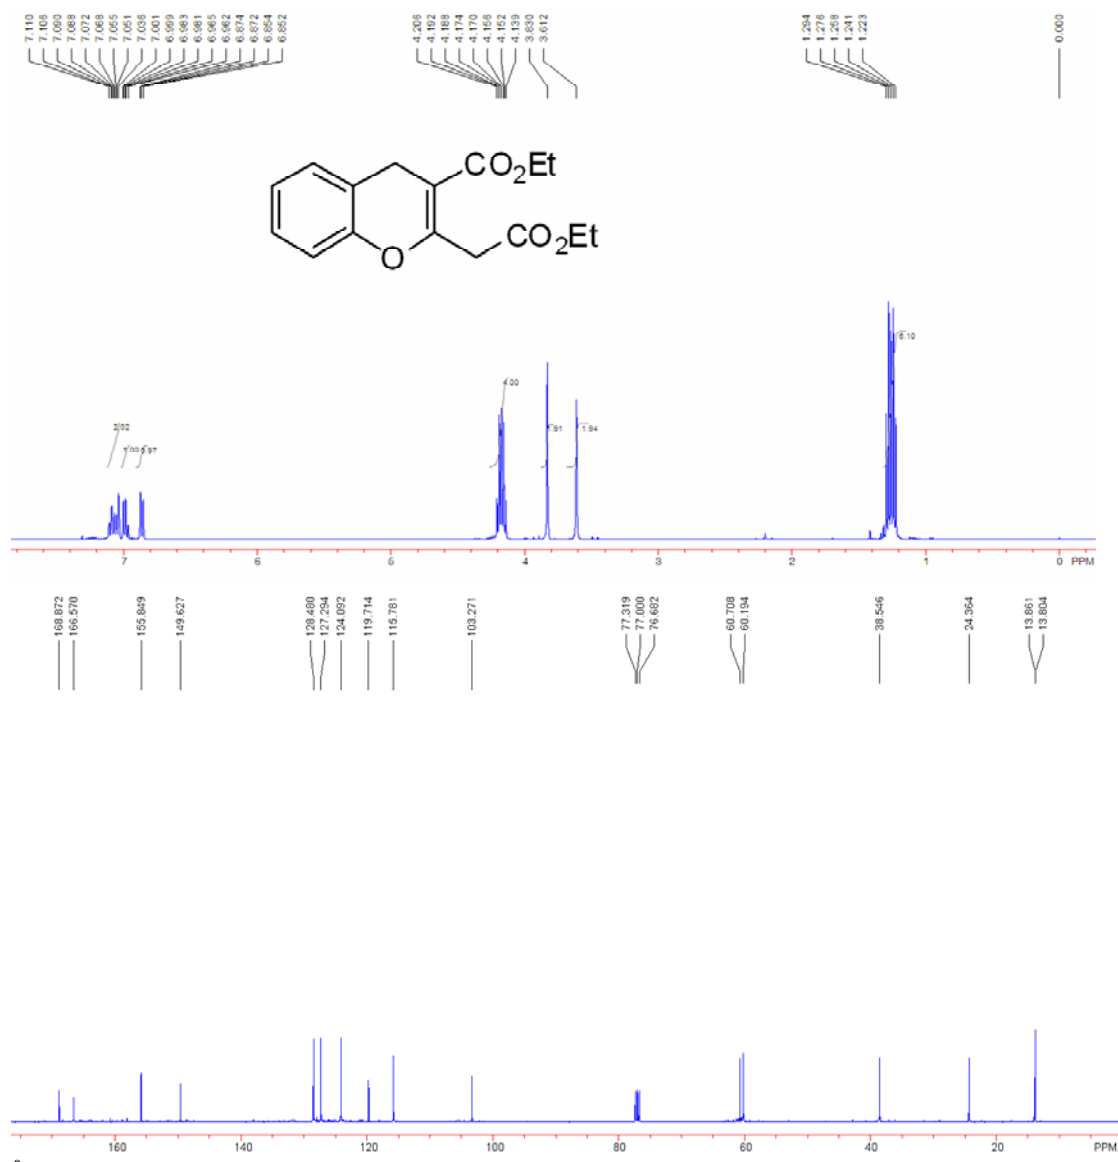

2,3,4,9-Tetrahydro-1*H*-xanthen-1-one **3da**.<sup>3</sup>

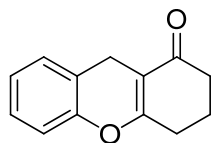

Red solid; Mp. 131.2-131.9 °C; <sup>1</sup>H NMR (400 MHz, CDCl<sub>3</sub>, TMS)

δ 2.03-2.08 (m, 2H), 2.45 (t, *J* = 6.8 Hz, 2H), 2.55 (t, *J* = 5.6 Hz, 2H), 3.49 (s, 2H), 3.69 (s, 2H), 6.94 (d, *J* = 8.4 Hz, 1H), 7.04 (dt, *J* = 1.2, 7.6 Hz, 1H), 7.12-7.16 (m, 2H); <sup>13</sup>C NMR (100 MHz, CDCl<sub>3</sub>, TMS) δ 20.5, 21.0, 27.6, 36.5, 109.9, 116.3, 120.7, 124.5, 127.4, 129.5, 149.7, 166.7, 198.0; MS (ESI) *m/z* (%): 201.1 (M + H, 21); HRMS (Micromass LCT) Calcd. for C<sub>13</sub>H<sub>13</sub>O<sub>2</sub>: 201.0916; Found: 201.0917.



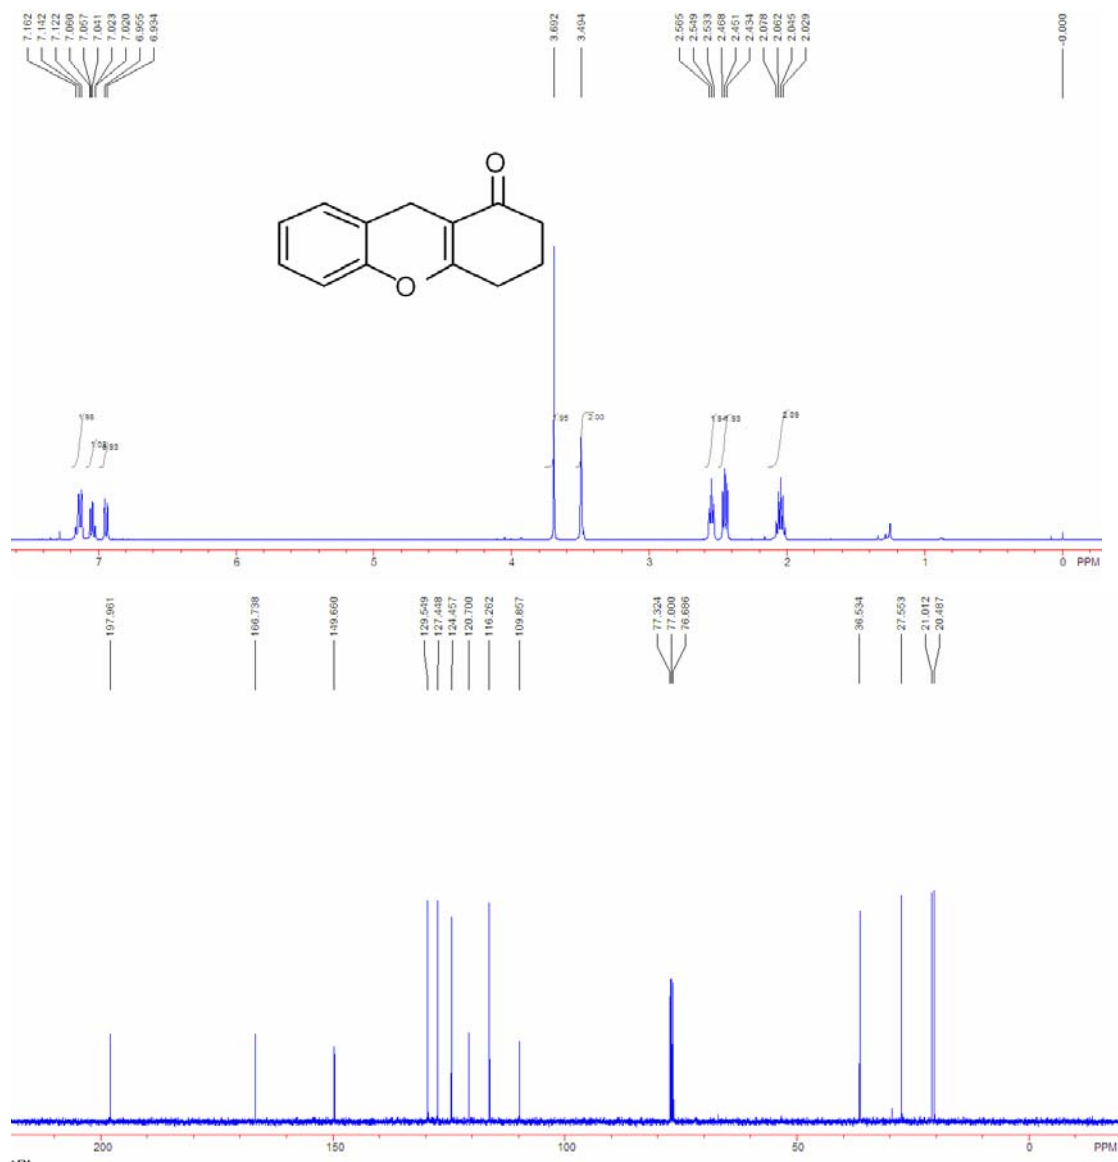

7-Bromo-5-methoxy-2,3,4,9-tetrahydro-1H-xanthen-1-one **3dk**.

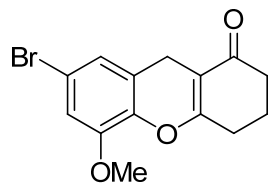

Red solid; Mp. 187.0-188.0 °C; <sup>1</sup>H NMR (400 MHz, CDCl<sub>3</sub>, TMS) δ 2.02-2.08 (m, 2H), 2.45 (t, *J* = 5.6 Hz, 2H), 2.60 (t, *J* = 5.6 Hz, 2H), 3.41 (s, 2H), 3.86 (s, 3H), 6.84 (s, 1H), 6.85 (s, 1H); <sup>13</sup>C NMR (100 MHz, CDCl<sub>3</sub>, TMS) δ 20.4, 20.9, 27.4, 36.4, 56.1, 109.4, 113.5, 116.4, 123.3, 123.5, 138.4, 148.3, 166.1, 197.6; MS (ESI) *m/z* (%): 309.0 (M + H, 71); HRMS (Micromass LCT) Calcd. for C<sub>14</sub>H<sub>14</sub>BrO<sub>3</sub>: 309.0126; Found: 309.0130.

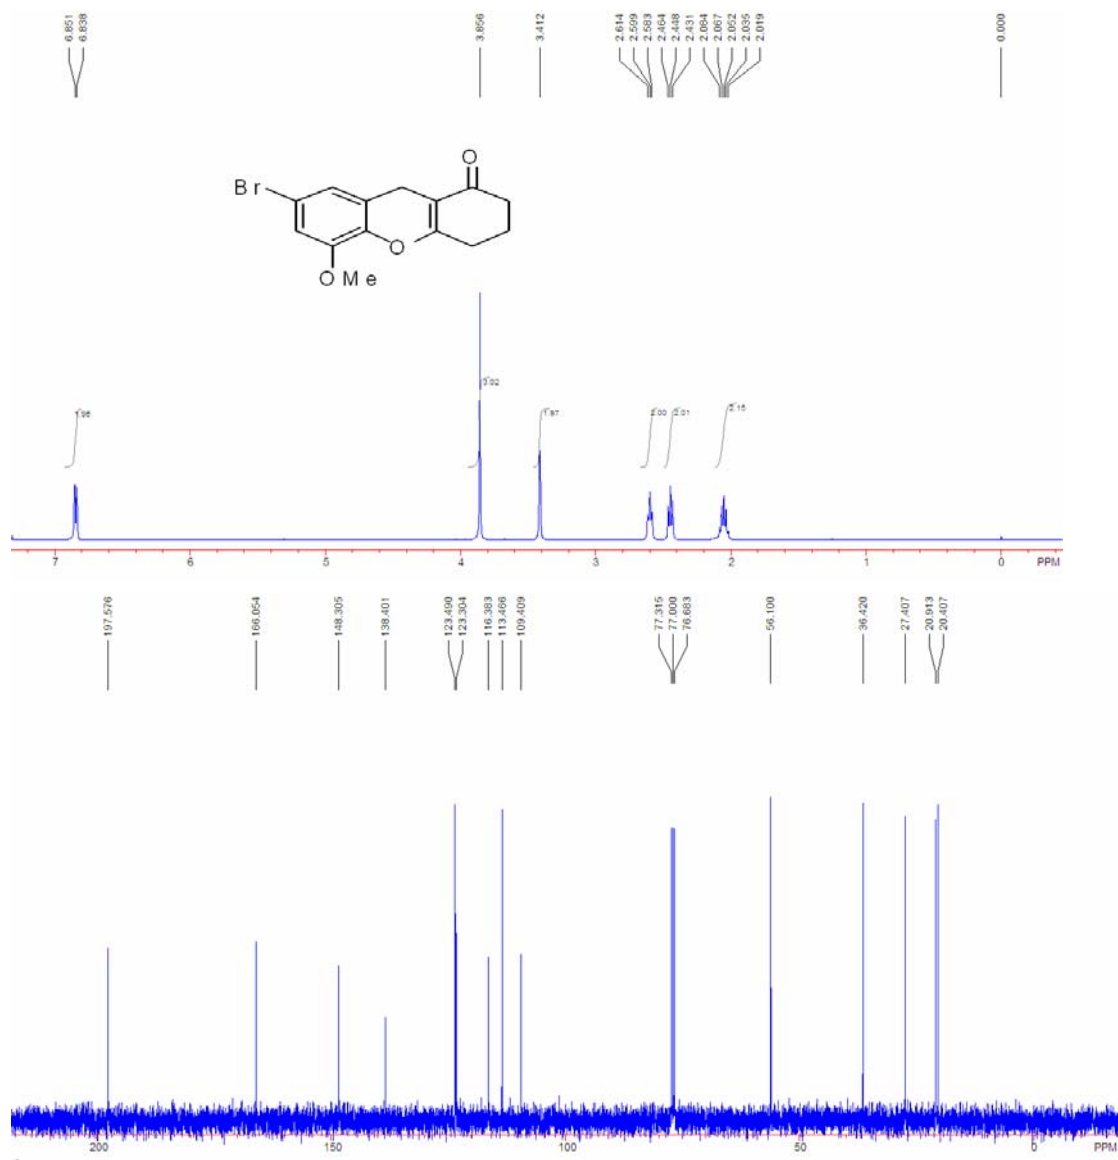

Reference:

1. C. C. Malakar, D. Schmidt, J. Conrad, U. Beifuss, *Org. Lett.* **2011**, *13*, 1972-1975.
2. K. M. McQuaid, J. Z. Long, D. Sames, *Org. Lett.* **2009**, *11*, 2972-2975.
3. Y. Fang, C. Li, *J. Org. Chem.* **2006**, *71*, 6427-6431.
